1                   **Molecularly distinct models of zebrafish *Myc*-induced B cell leukemia**

2  
3 Chiara Borga<sup>1\*</sup>, Clay A. Foster<sup>1\*</sup>, Sowmya Iyer<sup>2,3\*</sup>, Sara P. Garcia, David M. Langenau<sup>2,3†</sup>, J.  
4 Kimble Frazer<sup>1†</sup>

5 <sup>1</sup>Section of Pediatric Hematology-Oncology, Department of Pediatrics, University of Oklahoma  
6 Health Sciences Center, Oklahoma City, OK 73104; <sup>2</sup>Department of Pathology and Center for  
7 Cancer Research, Massachusetts General Hospital Research Institute, Boston, MA 02114;  
8 <sup>3</sup>Harvard Stem Cell Institute, Boston, MA 02114

9  
10 \*Co-first authorship contribution

11 †Equal senior authorship contribution

12  
13 Corresponding authors:

14 J. Kimble Frazer, University of Oklahoma Health Sciences Center, Basic Sciences Education  
15 Bldg., 941 Stanton L Young, Rm. 229 Oklahoma City, OK 73104, USA. Phone: 405-271-5311  
16 ext. 42375. Fax: 405-271-1025. Email: [Kimble-Frazer@ouhsc.edu](mailto:Kimble-Frazer@ouhsc.edu)

17 David M. Langenau, Harvard Medical School and Massachusetts General Hospital, 149 13th  
18 Street, office #6012, Charlestown, Massachusetts 02129, USA. Phone: 617-643-6508. Email:  
19 [dlangenau@mgh.harvard.edu](mailto:dlangenau@mgh.harvard.edu)

20  
21 **Conflict of interest disclosure statement:** Authors declare no conflict of interests.

22

23 **Abstract:**

24 Zebrafish models of T cell acute lymphoblastic leukemia (T-ALL) have been studied for over a  
25 decade, but curiously, robust zebrafish B cell ALL (B-ALL) models had not been described.  
26 Recently, our laboratories reported two seemingly closely-related models of zebrafish B-ALL. In  
27 these genetic lines, the primary difference is expression of either murine or human transgenic c-  
28 MYC, each controlled by the zebrafish *rag2* promoter. Here, we compare ALL gene expression  
29 in both models. Surprisingly, we find that B-ALL arise in different B cell lineages, with *ighm*<sup>+</sup>  
30 vs. *ighz*<sup>+</sup> B-ALL driven by murine *Myc* vs. human *MYC*, respectively. Moreover, these B-ALL  
31 types exhibit signatures of distinct molecular pathways, further unexpected dissimilarity. Thus,  
32 despite sharing analogous genetic makeup, the ALL types in each model are markedly different,  
33 proving subtle genetic changes can profoundly impact model organism phenotypes. Investigating  
34 the mechanistic differences between mouse and human c-MYC in these contexts may reveal key  
35 functional aspects governing MYC-driven oncogenesis in human malignancies.

36 Zebrafish are a valuable leukemia model due to highly conserved hematopoietic and  
37 oncogenic pathways, facile genetics, and ease of use in chemical genetic screens. However, until  
38 recently, robust zebrafish B-cell leukemia models had not been described<sup>1, 2</sup>. The first transgenic  
39 zebrafish leukemia model was created 15 years ago and targeted murine *c-Myc* (*mMyc*) to  
40 thymocytes of AB strain zebrafish, leading to the rapid development of T-cell acute  
41 lymphoblastic leukemia (T-ALL)<sup>3</sup>. Additional genetic models were subsequently developed that  
42 result in induction of T-ALL<sup>4</sup>, but B-cell leukemia models lagged behind<sup>5, 6</sup>.

43 In two recent reports published in *Leukemia*, our groups independently demonstrated the  
44 development of zebrafish B-ALL using transgenic expression of *mMyc* or human *c-MYC*  
45 (*hMYC*) controlled by the zebrafish recombination activating gene 2 (*rag2*) promoter<sup>1, 2</sup>. Both  
46 models shared genetic and phenotypic features, but there were also key differences including  
47 strain background and species differences in the MYC transgene that was used to generate each  
48 model. Here, we compare and contrast these models, making the important finding that zebrafish  
49 develop at least four molecularly distinct ALL types, including cortical thymocyte-arrested  
50 *cd4<sup>+</sup>/cd8<sup>+</sup>* T-ALL, *ighm<sup>+</sup>* B-ALL, *ighz<sup>+</sup>* B-ALL, and biphenotypic T/B-ALL.

51 Thirteen ALLs were purified from *rag2:hMYC;lck:eGFP* double-transgenic fish<sup>2</sup>. As  
52 previously reported, these leukemias had heterogeneous GFP expression, with T-ALL being  
53 exclusively GFP<sup>hi</sup>, B-ALL exclusively GFP<sup>lo</sup>, and other fish harboring mixed-ALL with both  
54 GFP<sup>hi</sup> and GFP<sup>lo</sup> cells, representing simultaneous T- and B-ALL, respectively<sup>2</sup>. Leukemias were  
55 subjected to RNA-seq transcriptomic profiling and compared with transplanted leukemias  
56 generated from single ALL clones described by Garcia et al., 2018<sup>1</sup>. Principal Component  
57 Analysis clearly distinguished *mMyc*-induced T-ALL from B-ALL, with the single *mMyc*-  
58 induced biphenotypic B/T-ALL clustering between these samples (Fig. 1A). The eight *hMYC*-

59 induced ALLs that were largely GFP<sup>hi</sup> clustered with known T-ALLs (2, 6, 8-11, 13, 14), while  
60 three primarily GFP<sup>lo</sup> ALL clustered near the *mMyc* B-ALLs (3-5). Two *hMYC*-induced ALLs  
61 with substantial populations of both GFP<sup>lo</sup> and GFP<sup>hi</sup> cells grouped near the *mMyc* biphenotypic  
62 B/T leukemia. Hierarchical clustering using the top 100 positively- and negatively-correlated  
63 genes from PC2 confirmed that these genes defined B and T lymphocytes, respectively (Fig. 1B),  
64 with B-ALLs expressing *cd79b*, *syk*, *pax5*, *blnk* and *efb1*, while T-ALLs expressed *cd8b*, *lck*,  
65 *runx3* and *gata3*. As previously reported, the biphenotypic B/T-ALL and mixed *hMYC*-induced  
66 ALLs expressed both T- and B-cell lineage genes<sup>1, 2</sup>. PC2 up-regulated genes were enriched for  
67 B cell signaling pathways when independently assessed by GSEAsig (Supplemental Tables 1 and  
68 2).

69 To examine clonality and maturation in *mMyc*- and *hMYC*-induced ALL, we next  
70 analyzed the expression of constant and variable regions of the T cell receptor  $\beta$  (*tcrcb*) and  
71 immunoglobulins  $\mu$  and  $\zeta$  (*ighm*, *ighz*; Fig. 2A). Every *mMyc* and *hMYC* T-ALL exhibited *tcrcb*  
72 expression, with V(D)J recombination occurring in most samples as determined by expression of  
73 specific variable regions<sup>1</sup>. Conversely, *mMyc* and *hMYC* B-ALL did not recombine or express  
74 *tcrcb*, but expressed constant regions of *ighm* or *ighz*. Ig variable regions were not detected,  
75 indicating V(D)J rearrangement likely had not occurred in these leukemias and suggesting B-  
76 ALLs arrest at the early pro-B cell stage. As expected, *hMYC* mixed-ALL contained distinct T-  
77 and B-ALL clones expressing both *tcrcb* and *ig* mRNAs, with their relative expression correlating  
78 well with the percentage of GFP<sup>hi</sup>/T-ALL vs. GFP<sup>lo</sup>/B-ALL cells found in each sample (Fig. 2A).  
79 Intriguingly, *mMyc* B-ALL expressed exclusively *ighm* while *hMYC* B-ALL favored *ighz*  
80 expression, indicating that *mMyc* and *hMYC* might be oncogenic in distinct B cell lineages.

81 To further explore differences between these models, we next identified genes uniquely-  
82 expressed by T-ALL, *mMyc/ighm*<sup>+</sup> B-ALL, or *hMYC/ighz*<sup>+</sup> B-ALL (Fig. 2B). As expected T-  
83 ALLs expressed known T cell lineage markers, yet *mMyc/ighm*<sup>+</sup> and *hMYC/ighz*<sup>+</sup> B-ALLs were  
84 transcriptionally distinct. *mMyc/ighm*<sup>+</sup> B-ALL expressed *gfi1ab*, *zfhx3*, *notch1a*, *nflb*, and  
85 *gtf3aa*. By contrast, *hMYC/ighz*<sup>+</sup> B-ALL expressed higher *cd79a*, *cd83*, *mef2cb*, and *jak2a* levels.  
86 To further test for differences in these two molecular subtypes of B-ALL, we next performed  
87 GSEAsig using these same differentially-regulated genes. From this analysis, we uncovered that  
88 *mMyc/ighm*<sup>+</sup> B-ALLs exhibited significant enrichment for pathways regulating ribosome  
89 biogenesis and RNA binding (Fig. 2C and Supplemental Tables 3 and 4). By contrast,  
90 *hMYC/ighz*<sup>+</sup> B-ALLs were enriched for intracellular signaling, protein binding, and germinal  
91 center B cell maturation pathways. In support of our findings, Liu et al. recently reported the  
92 identification of molecularly and biological distinct *ighz*<sup>+</sup> and *ighm*<sup>+</sup> B cell lineages using  
93 *rag2:mCherry; cd79b:GFP* transgenic zebrafish<sup>7</sup>. In the context of normal B cell development,  
94 *ighz*<sup>+</sup> B cells were mCherry<sup>hi</sup>/GFP<sup>lo</sup> while *ighm*<sup>+</sup> B cells were mCherry<sup>hi</sup>/GFP<sup>hi</sup>. Overall, these  
95 results demonstrate that *mMyc/ighm*<sup>+</sup> and *hMYC/ighz*<sup>+</sup> B-ALLs are not subtle B cell leukemia  
96 variants, but rather distinct malignancies that arise in different B cell types with vastly different  
97 molecular pathway signatures.

98 In summary, although zebrafish B cell leukemia models were lacking for many years, our  
99 analyses reveal two highly-divergent types of B-ALL. This is surprising, as both models utilize  
100 the same promoter (*rag2*) to regulate a near-identical oncoprotein, c-Myc/MYC, with the only  
101 differences being the MYC transgene species of origin and the genetic backgrounds upon which  
102 the models were developed. Yet, despite the high molecular similarity of both models, these B-  
103 ALL subtypes also show unique gene expression signatures when compared to one another,

104 which likely reflects differences in both their lineage (*ighm* vs. *ighz*) and potential differences in  
105 MYC transcriptional targets expressed by the early developmental stages of these distinct pro-B  
106 cell populations. Our new analysis of these models reconciles the perceived differences in the  
107 manuscripts published by our groups, identifying four molecularly distinct ALL subtypes in  
108 zebrafish: cortical *cd4<sup>+</sup>/cd8<sup>+</sup>* T-ALL, biphenotypic B/T ALL, *ighm<sup>+</sup>* B-ALL, and *ighz<sup>+</sup>* B-ALL.  
109 Developing a wider array of leukemia models and refining mechanisms that drive their growth,  
110 aggression, and stem cell frequency will surely lead to new insights into human disease.

111 **Figure Legends:**

112 **Figure 1. Gene expression differences define T- vs. B-lineages in ALL of both the**  
113 ***rag2:mMyc* and *rag2:hMYC;lck:eGFP* models.** (A) Principal component analysis of RNAseq  
114 expression profiles of previously-classified *mMyc*-induced T- (blue, n=8), B- (red, n=2), or  
115 biphenotypic ALL (pink, n=1) and compared with 13 unknown *hMYC*-induced ALL (black). (B)  
116 Heat map and hierarchical clustering using the top 100 positively- and negatively-correlated  
117 genes from PC2. B cell-specific genes are denoted in blue and T cell-specific genes in red at the  
118 right.

119

120 **Figure 2. Identification of two molecularly-distinct B-ALL types arising independently in**  
121 **either the *ighm*<sup>+</sup> or *ighz*<sup>+</sup> B cell lineages.** (A) T cell receptor beta and Ig heavy chain expression  
122 in individual ALLs. *tcrc* recombination is denoted by grey-shaded boxes (left column), with  
123 percentage of GFP<sup>hi</sup> cells in each *rag2:hMYC;lck:eGFP* ALL noted in right column.  
124 Histograms depict expression of *tcrc* and *igh* constant regions by each ALL. Not available (NA).  
125 (B) Heatmap showing expression of genes differentially expressed in T-ALL, *mMyc/ighm*<sup>+</sup> B-  
126 ALL, and *hMYC/ighz*<sup>+</sup> B-ALL. (C) Gene set enrichment analysis using genes positively  
127 correlated with each ALL molecular subtype. T-ALL (blue), *mMyc/ighm*<sup>+</sup> B-ALL (red), and  
128 *hMYC/ighz*<sup>+</sup> B-ALL (orange). Complete geneset and GSEAsig results are provided in Supp.  
129 Tables 3 and 4.

130 **References:**

- 131 1. Garcia EG, Iyer S, Garcia SP, Loontjens S, Sadreyev RI, Speleman F, *et al.* Cell of origin dictates  
132 aggression and stem cell number in acute lymphoblastic leukemia. *Leukemia* 2018 2018/04/18.
- 133
- 134 2. Borga C, Park G, Foster C, Burroughs-Garcia J, Marchesin M, Shah R, *et al.* Simultaneous B and T  
135 cell acute lymphoblastic leukemias in zebrafish driven by transgenic MYC: implications for  
136 oncogenesis and lymphopoiesis. *Leukemia* 2018 2018/08/15.
- 137
- 138 3. Langenau DM, Traver D, Ferrando AA, Kutok JL, Aster JC, Kanki JP, *et al.* Myc-induced T cell  
139 leukemia in transgenic zebrafish. *Science* 2003 Feb 7; **299**(5608): 887-890.
- 140
- 141 4. Frazer JK, Meeker ND, Rudner L, Bradley DF, Smith AC, Demarest B, *et al.* Heritable T-cell  
142 malignancy models established in a zebrafish phenotypic screen. *Leukemia* 2009 Oct; **23**(10):  
143 1825-1835.
- 144
- 145 5. He S, Jing CB, Look AT. Zebrafish models of leukemia. *Methods Cell Biol* 2017; **138**: 563-592.
- 146
- 147 6. Squiban B, Frazer JK. Danio rerio: Small Fish Making a Big Splash in Leukemia. *Curr Pathobiol Rep*  
148 2014 Jun; **2**(2): 61-73.
- 149
- 150 7. Liu X, Li YS, Shinton SA, Rhodes J, Tang L, Feng H, *et al.* Zebrafish B Cell Development without a  
151 Pre-B Cell Stage, Revealed by CD79 Fluorescence Reporter Transgenes. *J Immunol* 2017 Sep 1;  
152 **199**(5): 1706-1715.

153

154



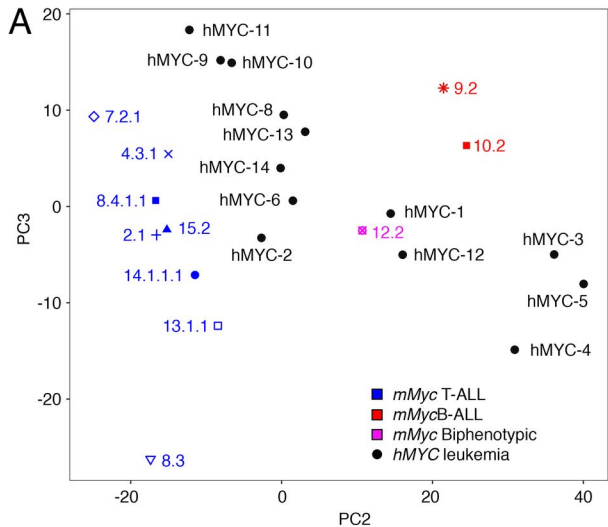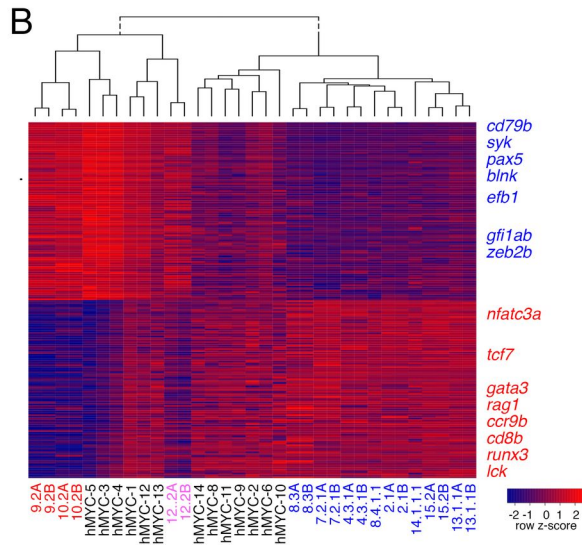

**A**

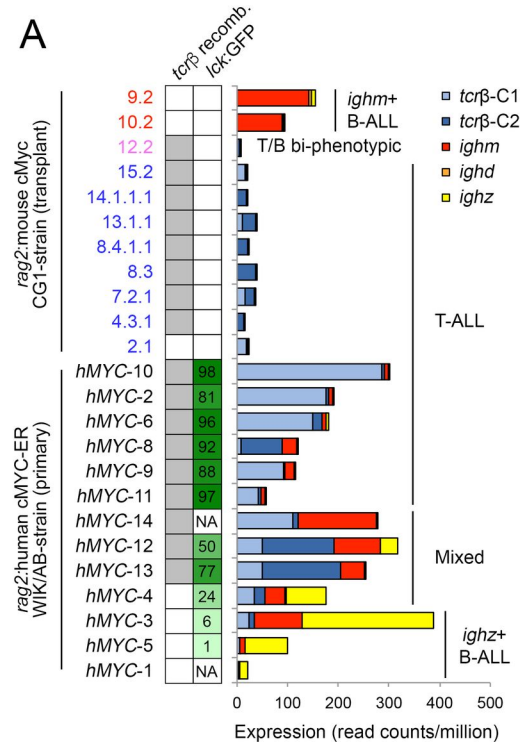

**B**

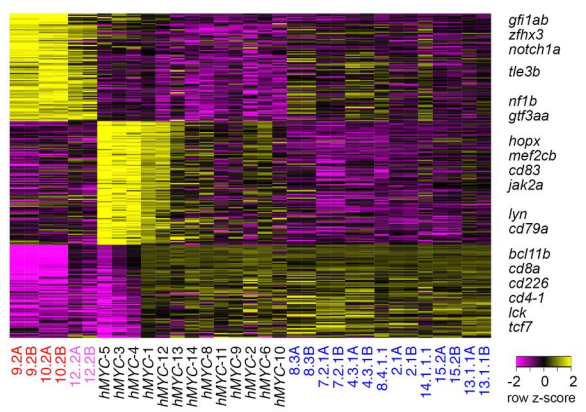

**C**

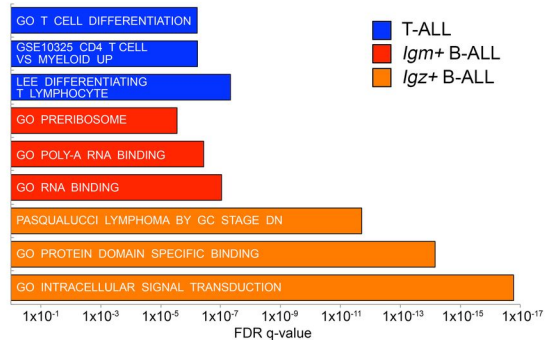

Source: https://www.biorxiv.org/content/10.1101/446245v2.full.pdf
